# Supplementary material
Source: MDPI journal article supplement (https://www.mdpi.com/2673-7418/3/1/15)

# Brunswick Lidar Frame Hillshade Plot

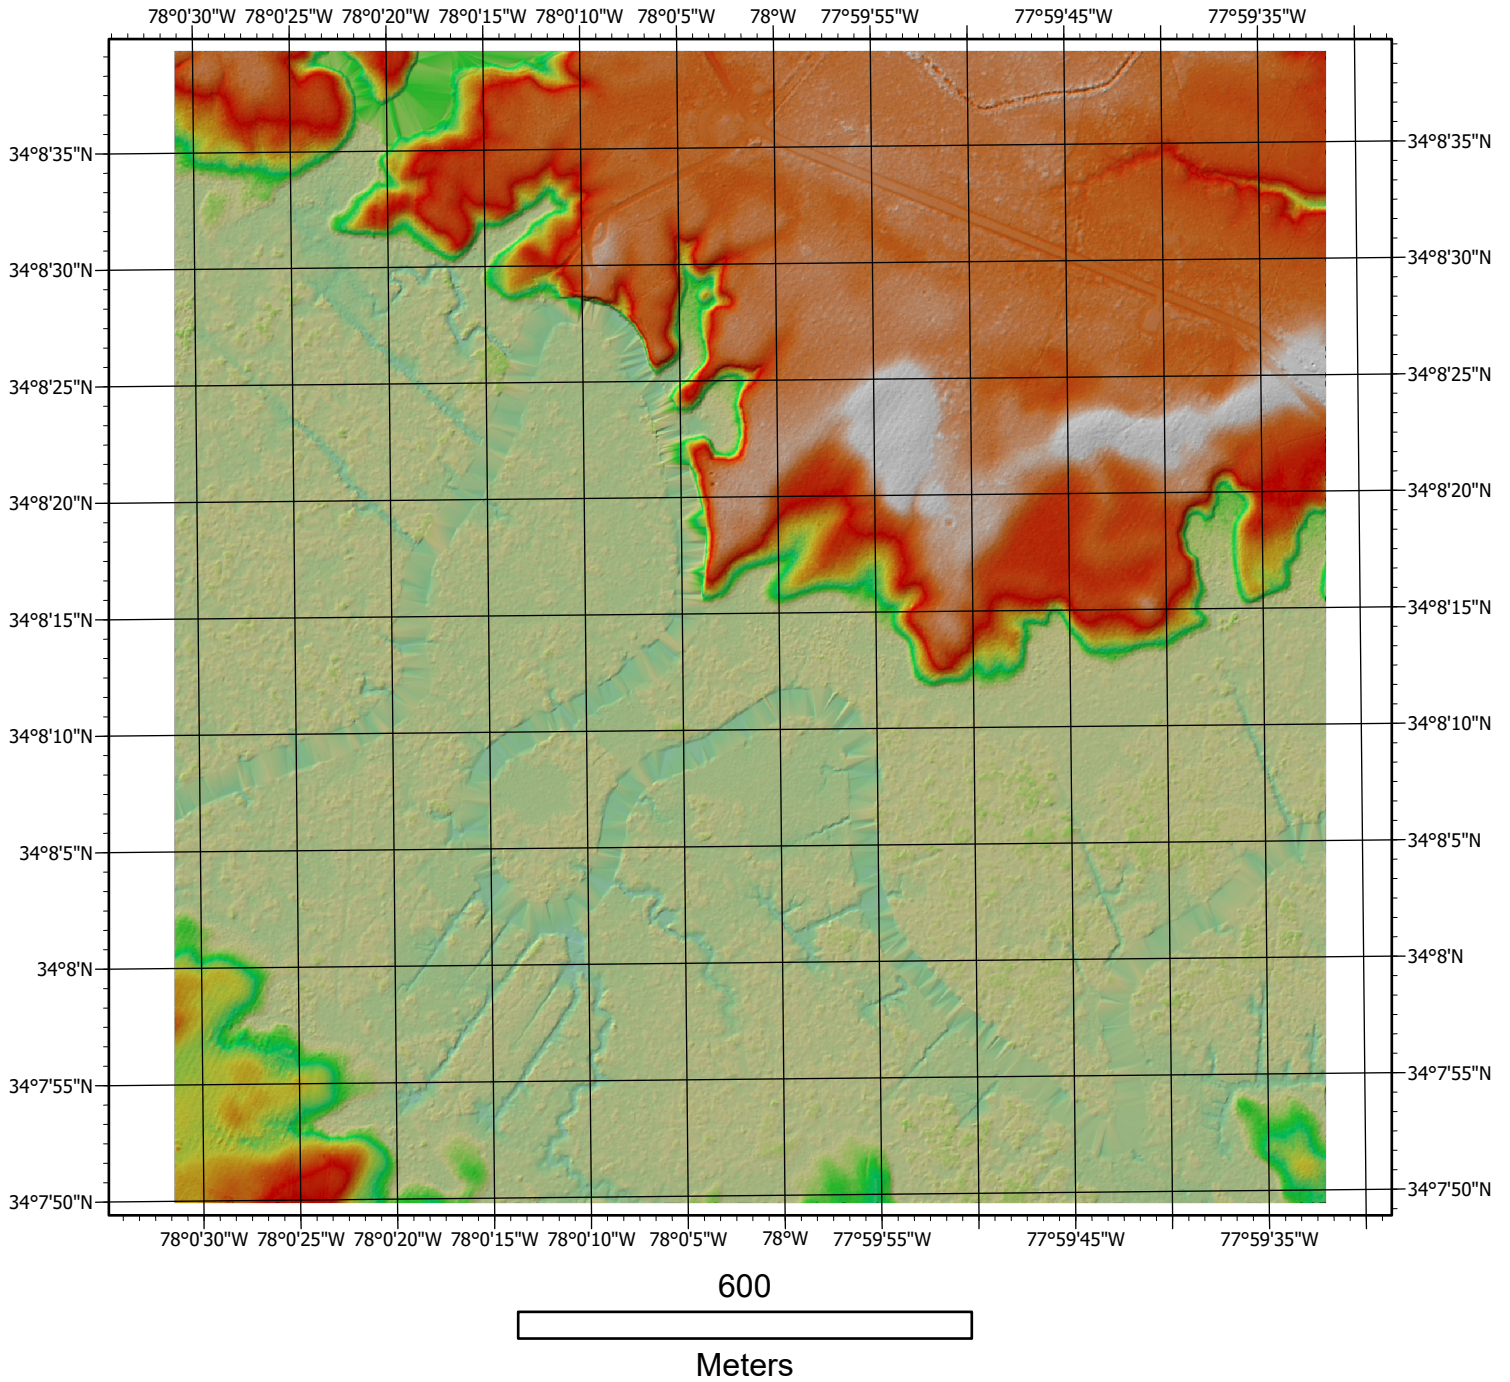

Supplement: s1 [file s1]

# Bull Neck Lidar Frame Hillshade Plot

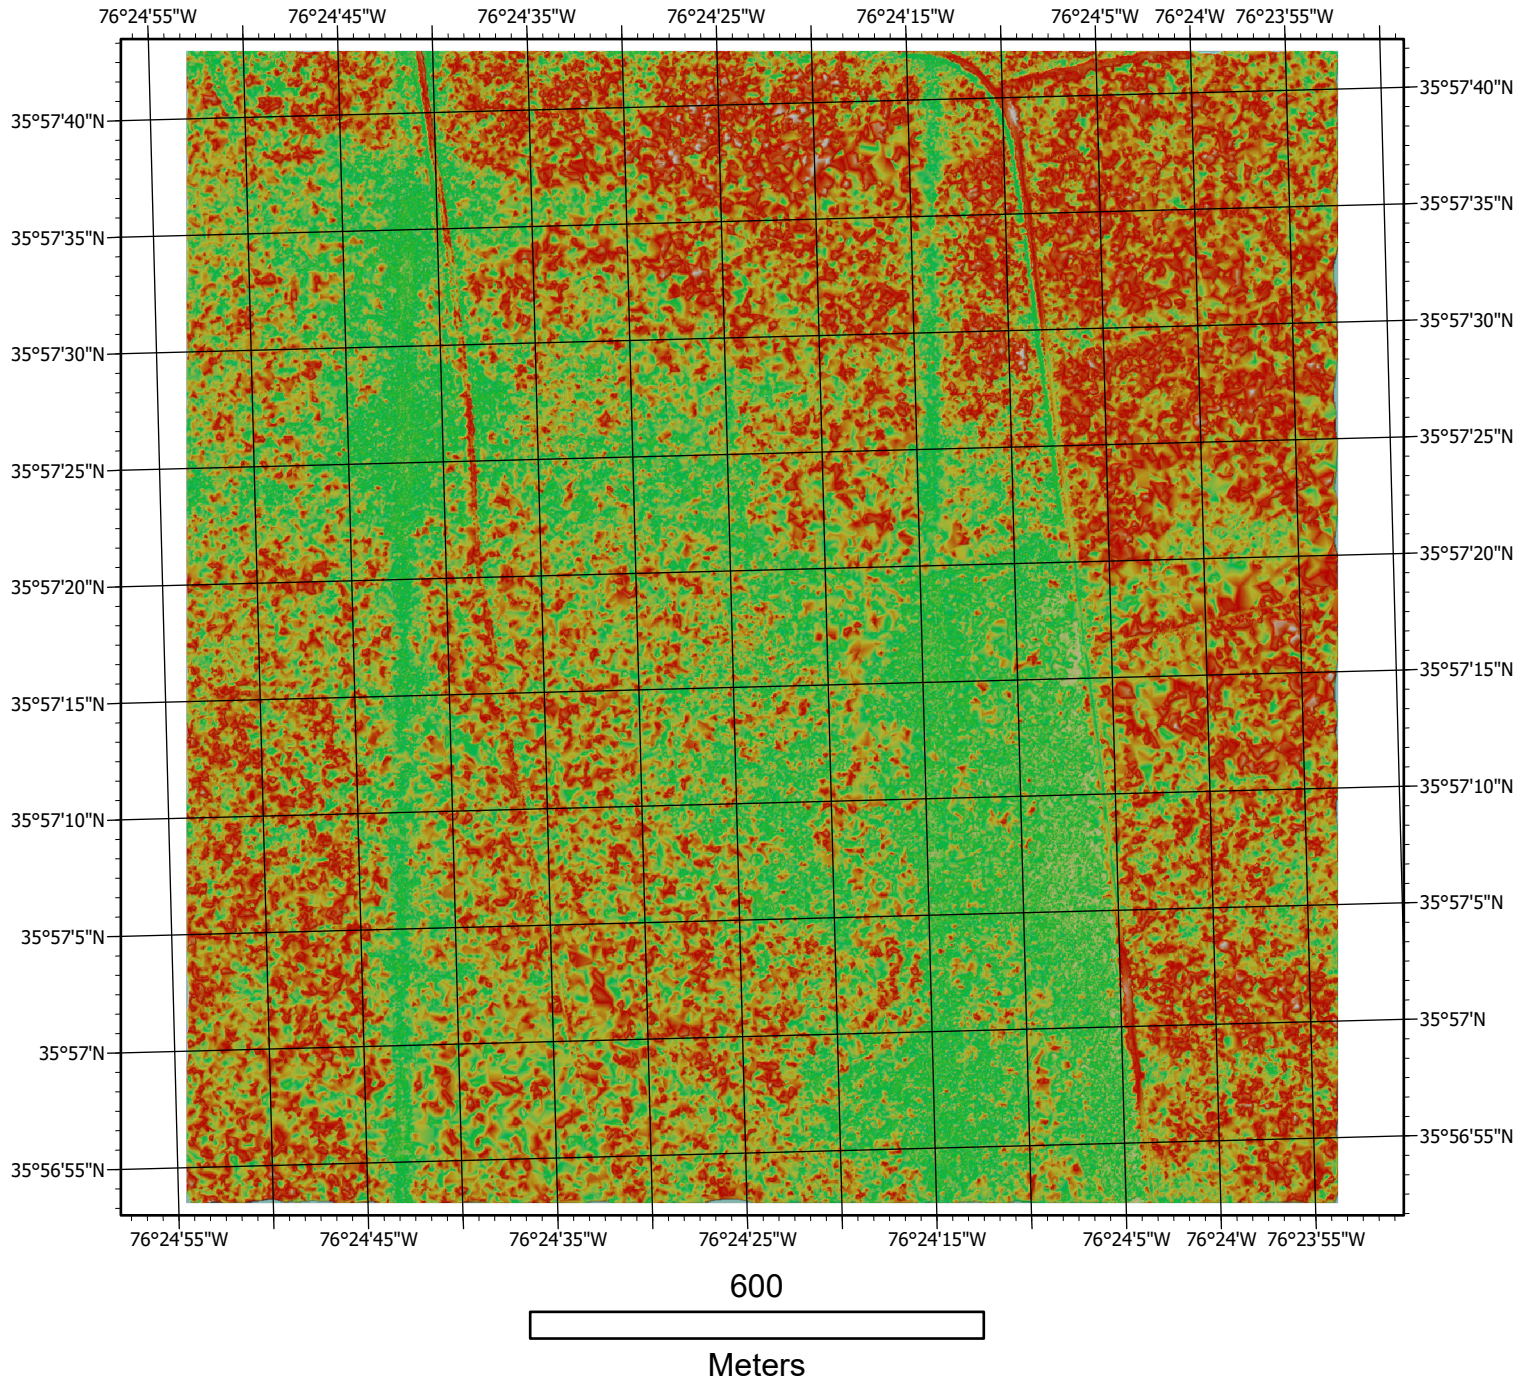

Supplement: s1 [file s1]

# Killetts Lidar Frame Hillshade Plot

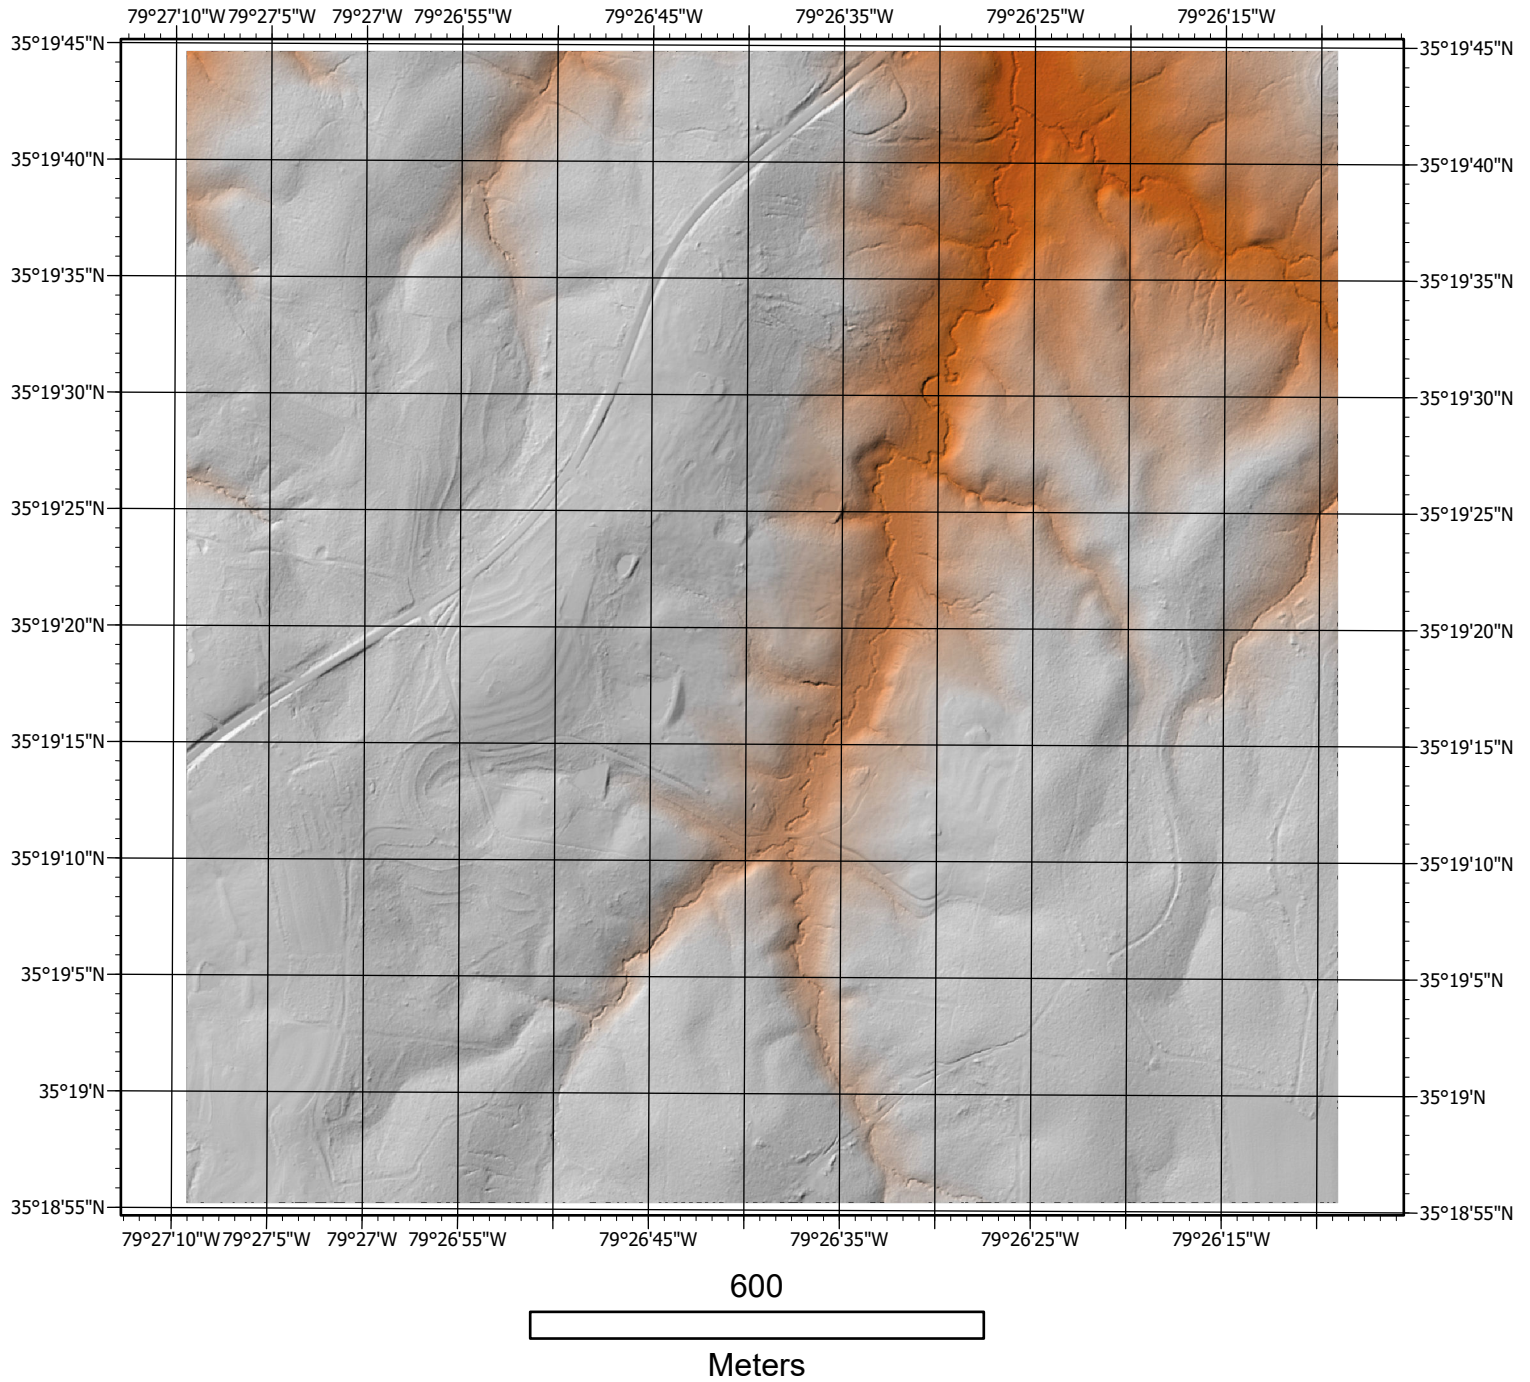

Supplement: s1 [file s1]

# Coweeta Lidar Frame Hillshade Plot

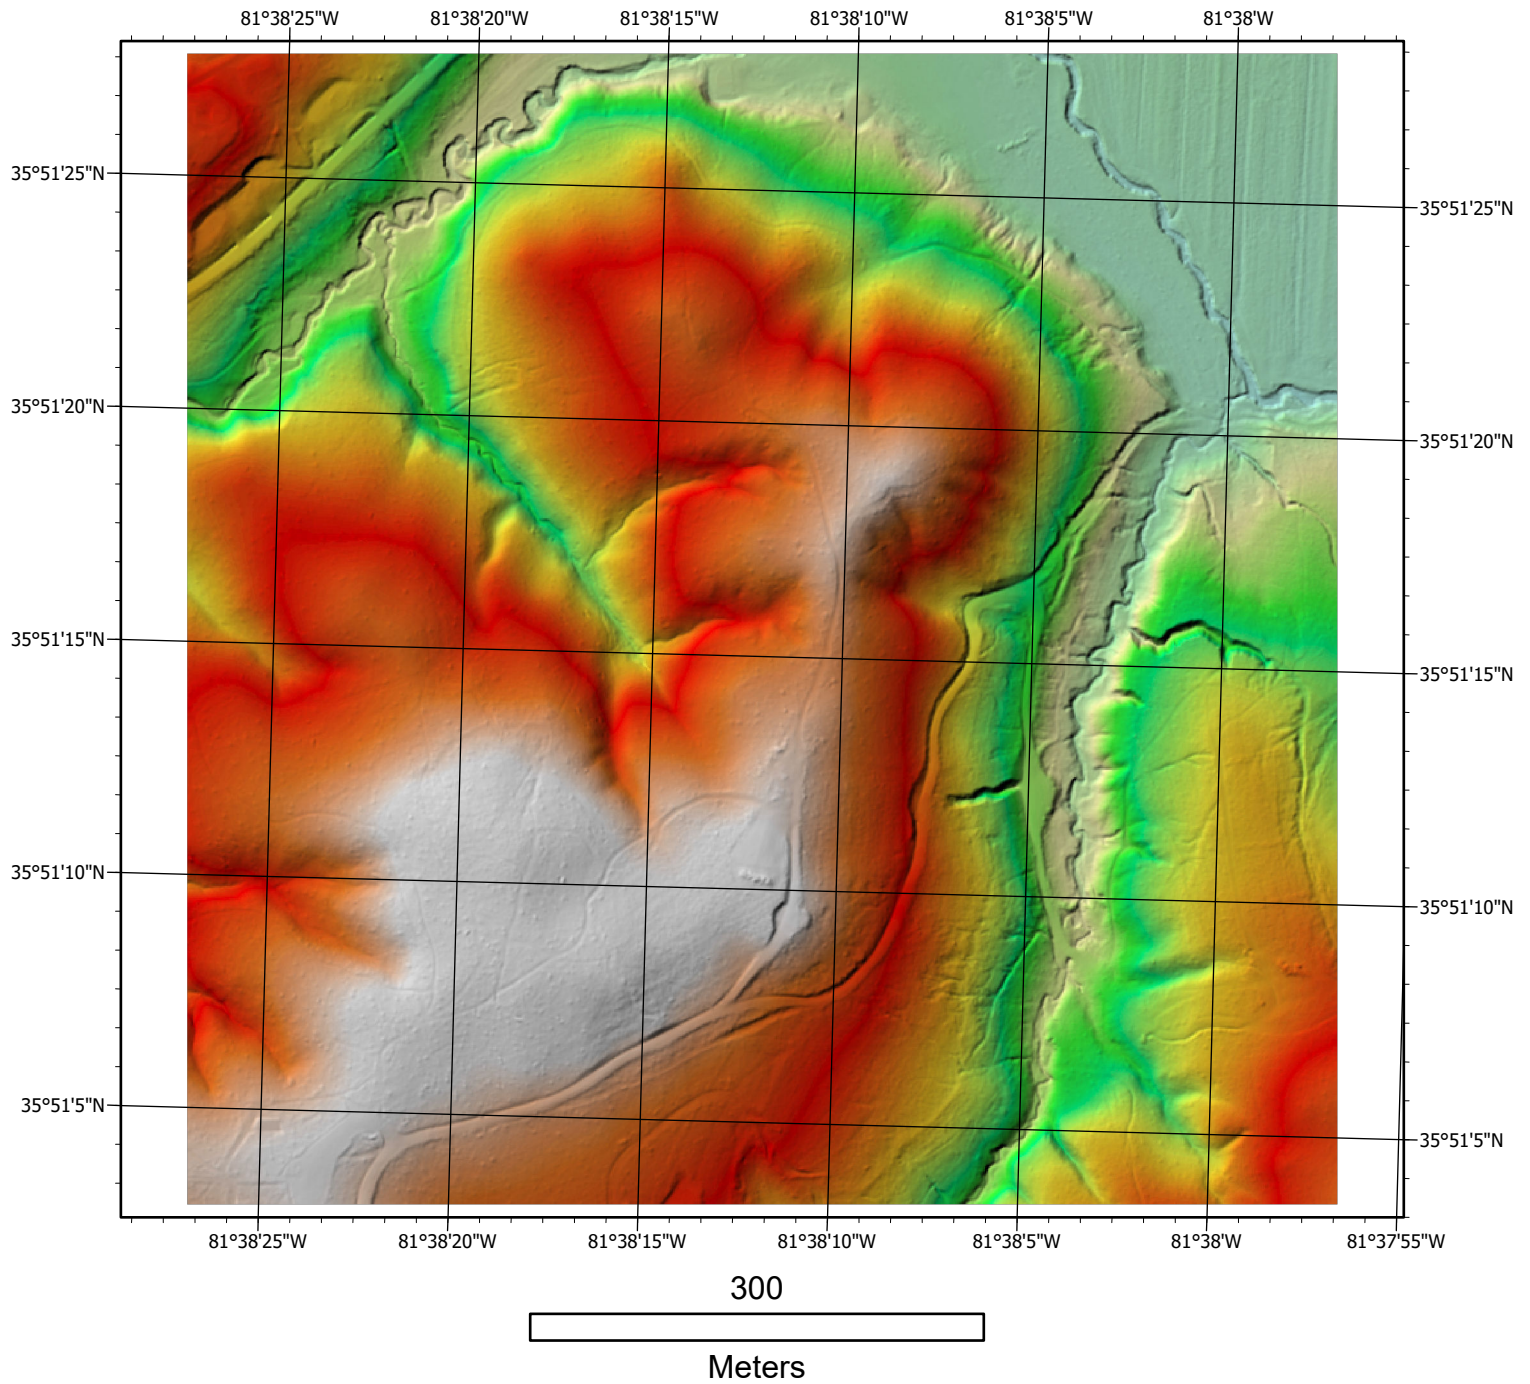

Supplement: s1 [file s1]

# Schenck Lidar Frame Hillshade Plot

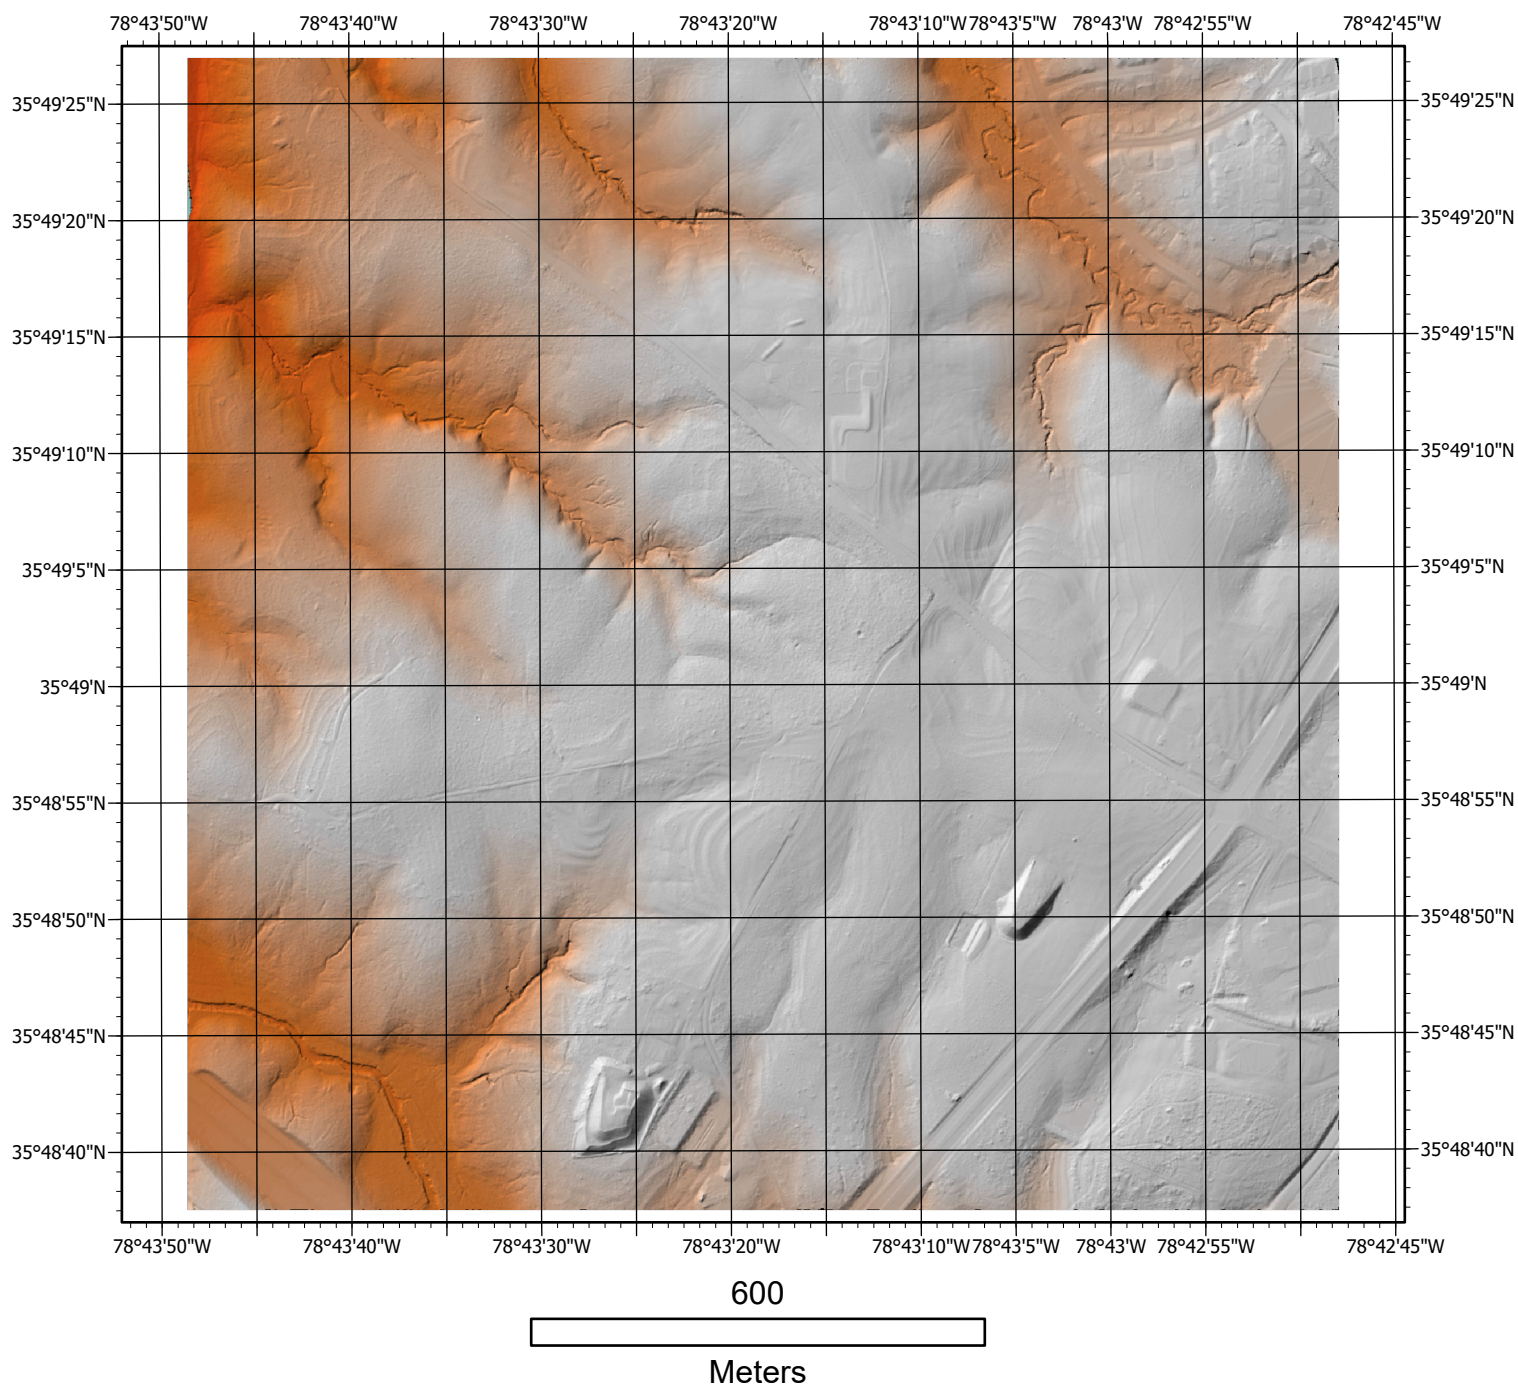

Supplement: s1 [file s1]

# Coweeta Lidar Frame Hillshade Plot

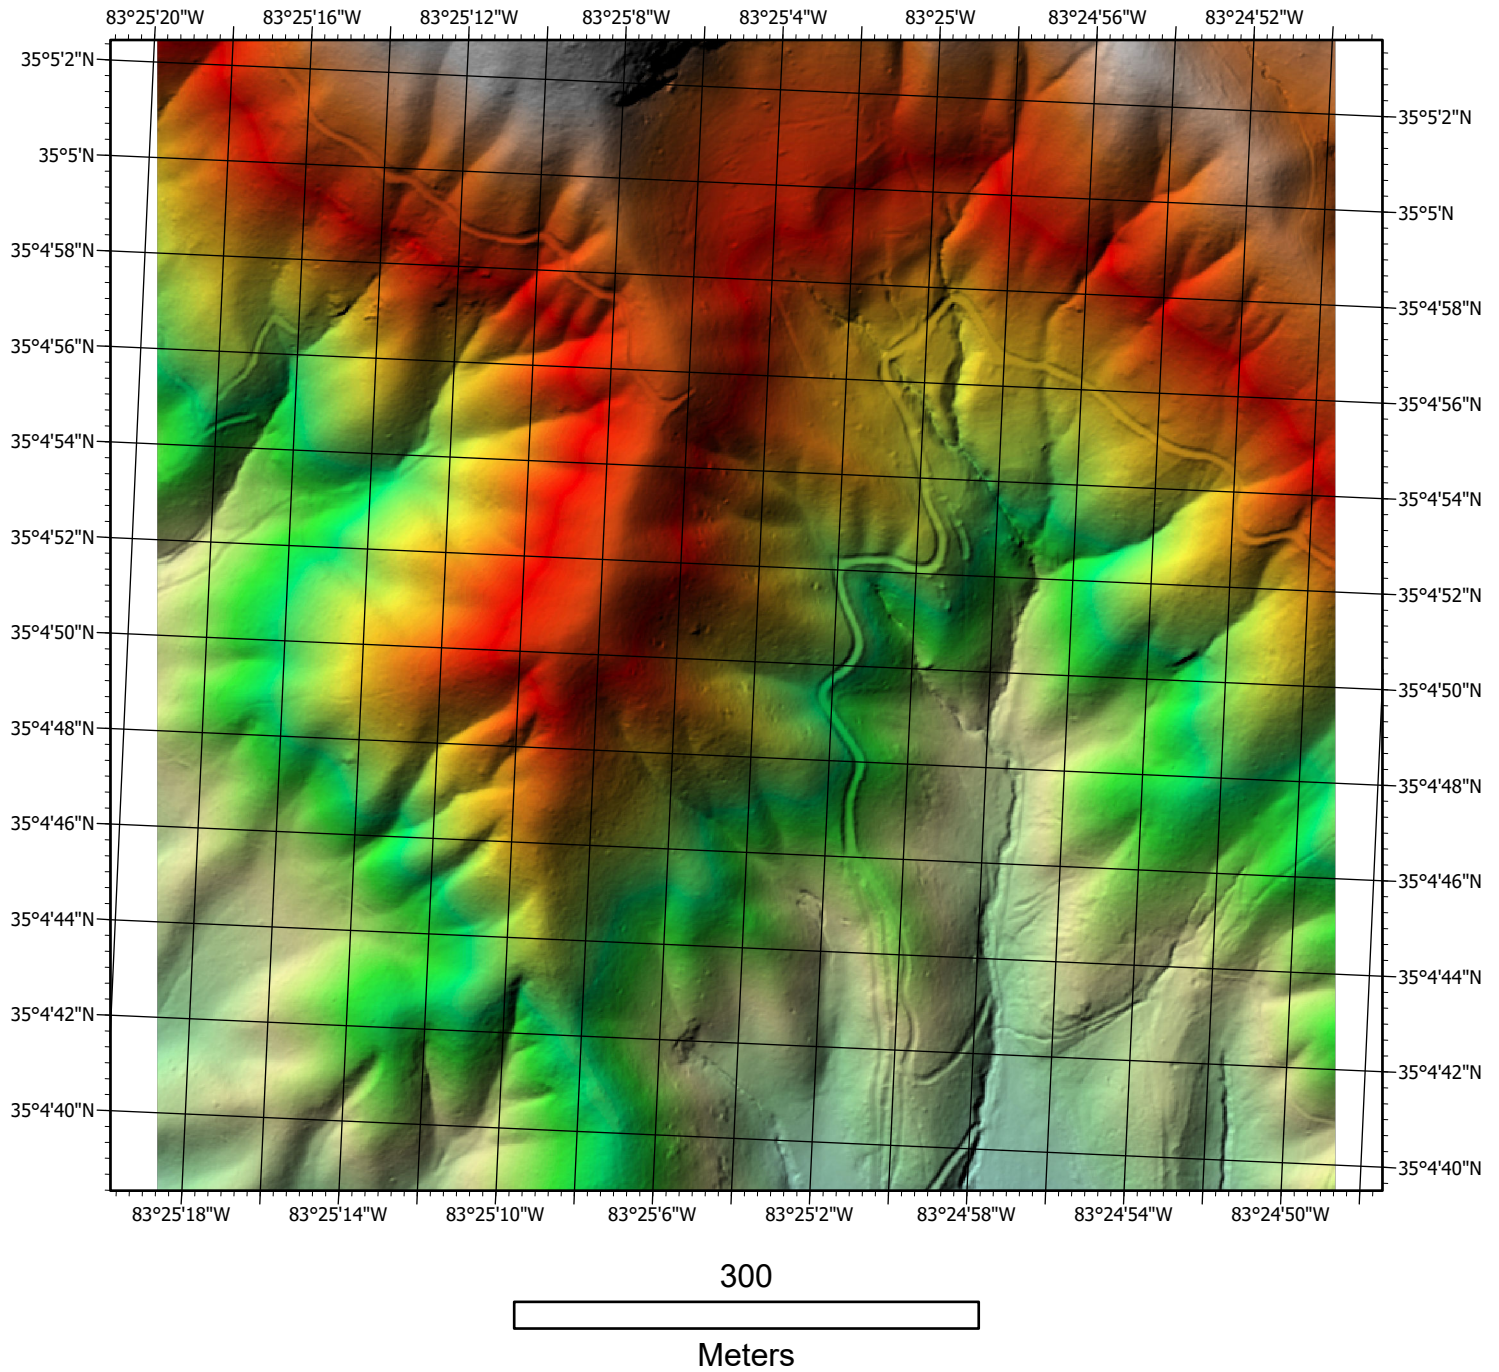

Supplement: s1 [file s1]
